# Supplementary material for: Viability and proliferation of endothelial cells upon exposure to GaN nanoparticles
Source: publisher site journal article supplement (doi:10.3762/bjnano.7.124), 2016-09-23
Supplement: Additional file 1 [file 2190-4286-7-124-S1.pdf]

# Supporting Information

for

## **Viability and proliferation of endothelial cells upon exposure to GaN nanoparticles**

Tudor Braniste<sup>1,2</sup>, Ion Tiginyanu<sup>1</sup>, Tibor Horvath<sup>2</sup>, Simion Raevschi<sup>3</sup>, Serghei Cebotari<sup>2</sup>, Marco Lux<sup>2</sup>, Axel Haverich<sup>2</sup> and Andres Hilfiker<sup>2,\*</sup>

Address: <sup>1</sup>National Center for Materials Study and Testing, Technical University of Moldova, bv. Stefan cel Mare 168, MD-2004 Chisinau, Republic of Moldova, <sup>2</sup>Leibniz Research Laboratories for Biotechnology and Artificial Organs (LEBAO), Department of Cardiothoracic, Transplantation and Vascular Surgery, Hannover Medical School, Carl Neuberg Str. 1, D-30625 Hannover, Germany and <sup>3</sup>Department of Physics and Engineering, State University of Moldova, str. Alexe Mateevici 60, MD-2009 Chisinau, Republic of Moldova

Email: Andres Hilfiker\* - hilfiker.andres@mh-hannover.de

\* Corresponding author

**Details regarding nanoparticle characterization, chemical analysis measurements and schematics of the surface functionalization process with nanoparticles**

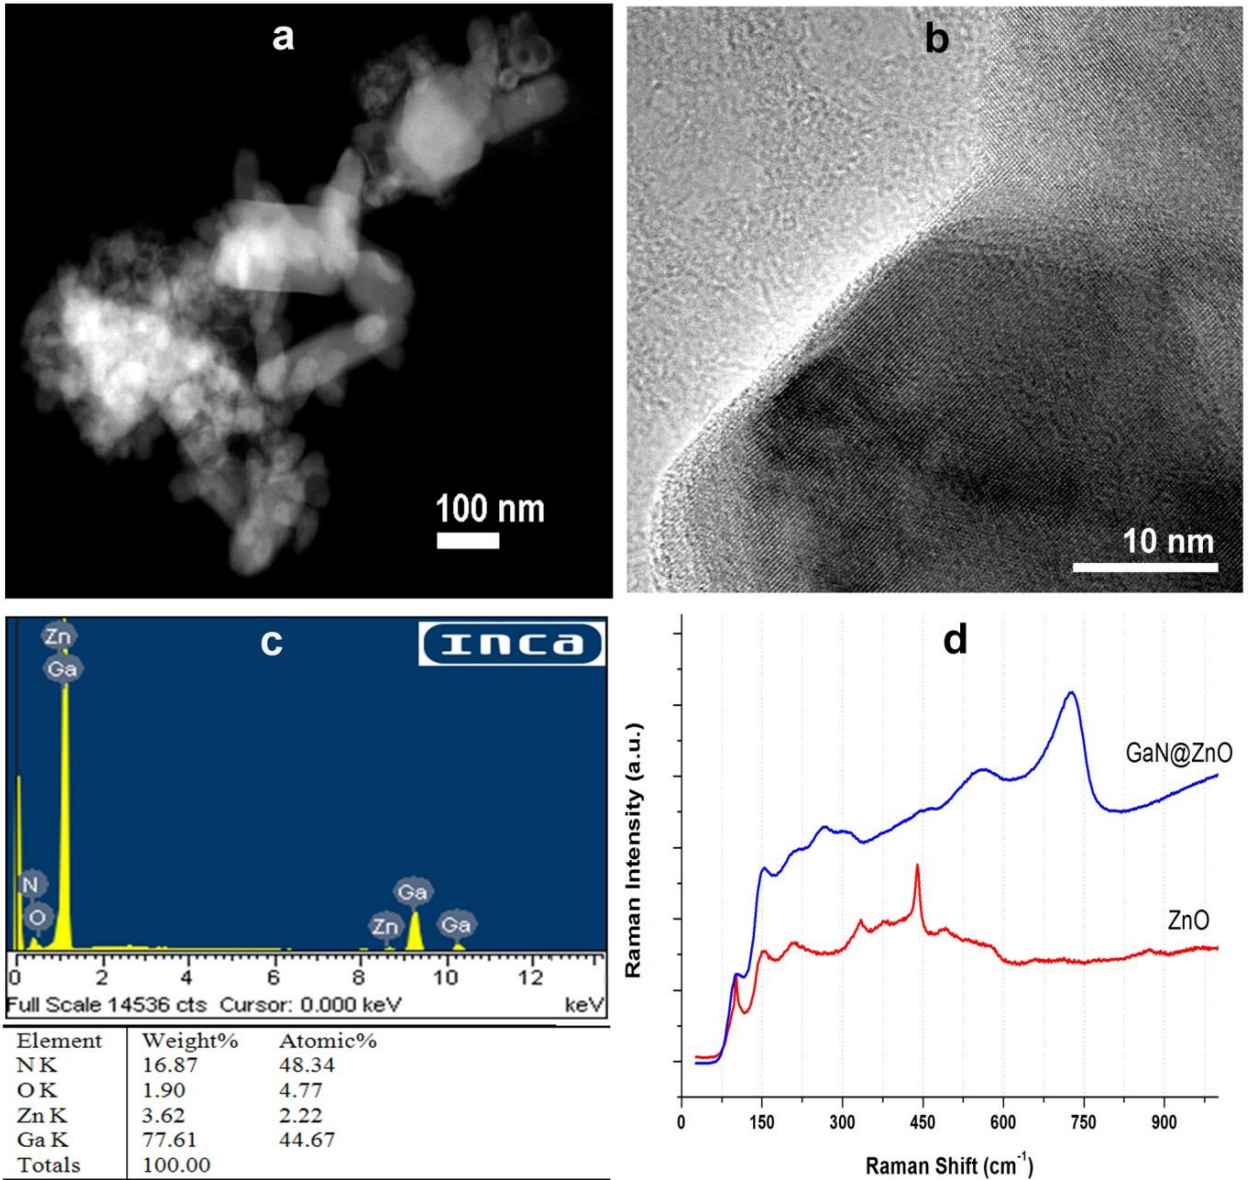

Figure S1: TEM images of GaN nanoparticles grown on a sacrificial layer of ZnO nanoparticles (a) and HRTEM of a single nanoparticle (b); EDX analysis is presented in (c) and comparative Raman measurements in (d).

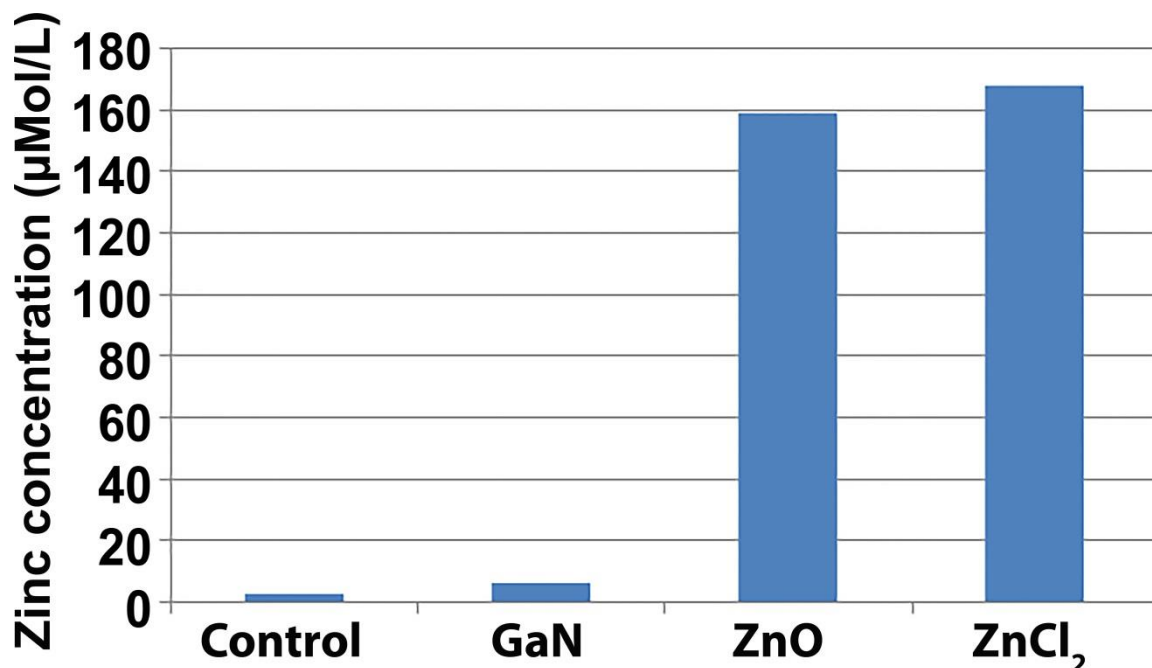

Figure S2: Zinc concentration released in the medium after incubation of EC with different types of nanoparticles at the concentration of 100 µg/mL, positive control is medium without any nanoparticles and negative control are samples with ZnCl<sub>2</sub> in the same concentration as ZnO and GaN.

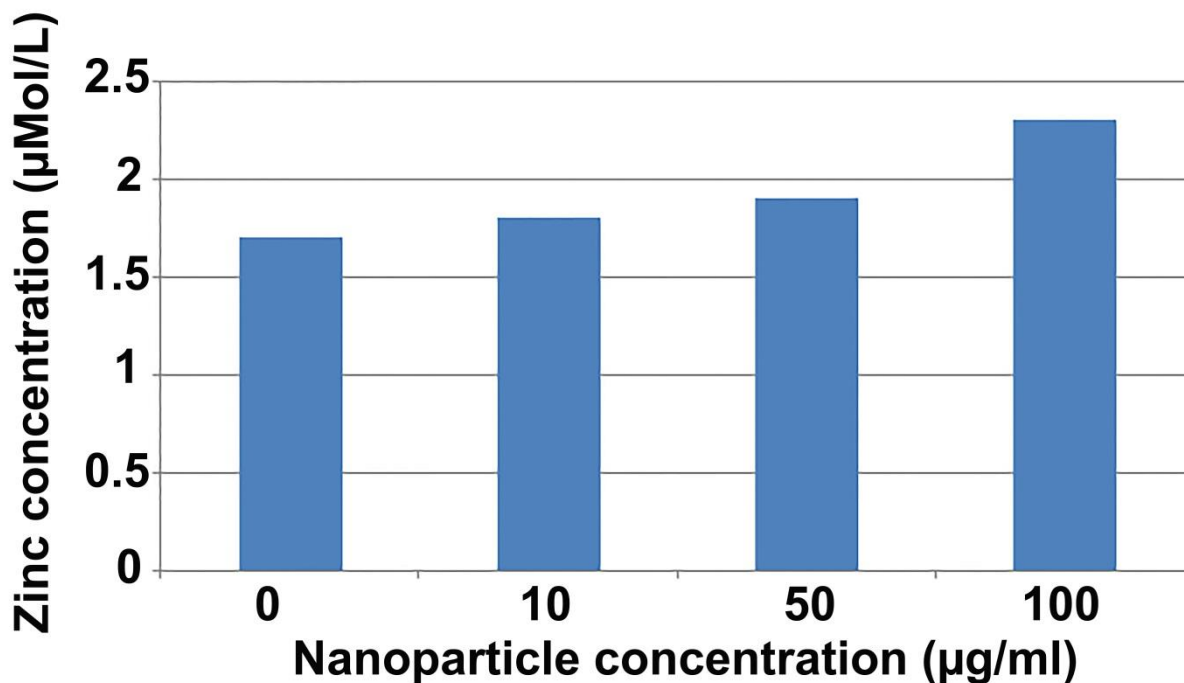

Figure S3: The concentration of zinc released in the culture medium after the incubation of EC with different concentrations of GaN nanoparticles.

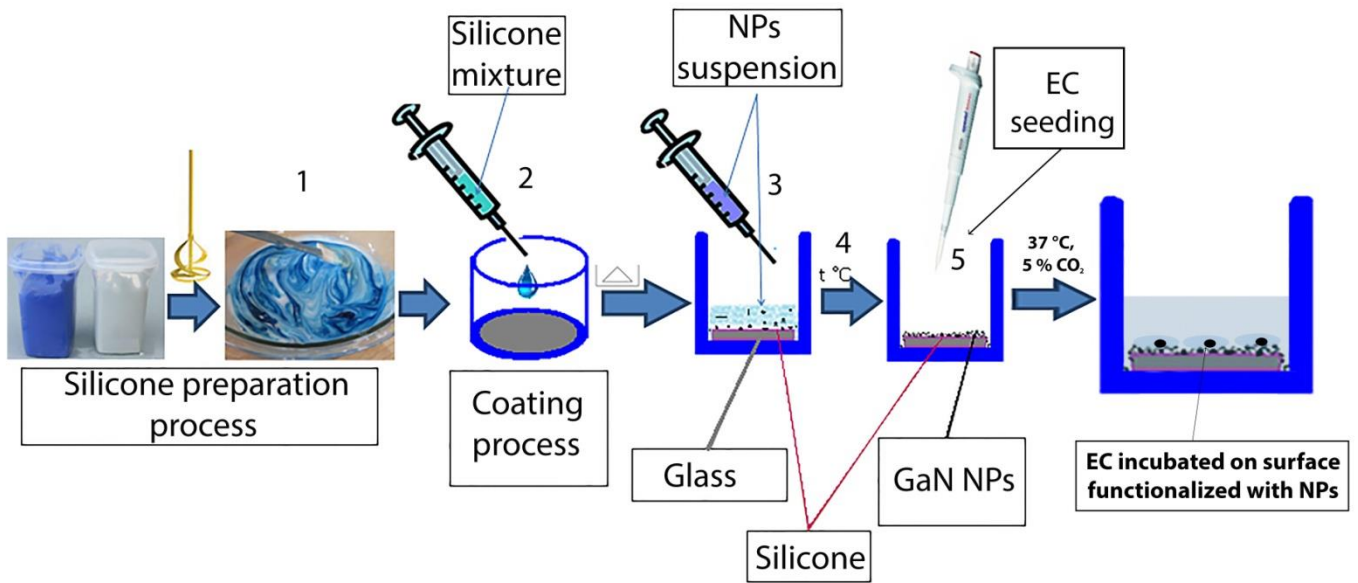

Figure S4: Schematic of the process of surface functionalization with GaN nanoparticles: 1. Mixing the two components of silicone; 2. Silicone spreading on the glass surface by spin coating; 3. Immediately after coating process was done the suspension of nanoparticles in deionized water was added; 4. During 12 h at 60 °C all the water evaporated, after that samples were sterilized at 180°C for 4 h; 5. Mounting coated glasses in culture plates and incubating endothelial cells on them.
